# Supplementary material
Source: ML conference proceedings conference paper supplement (https://openaccess.thecvf.com/content/CVPR2026/html/Wang_I2I-Bench_A_Comprehensive_CVPR_2026_paper.html)
Supplement: Supplementary file 1 [file I2I_Bench_Appendix.pdf › I2I_Bench_Appendix.pdf]

# I2I-Bench: A Comprehensive Benchmark for Image-to-Image Editing Models

## Appendix

Juntong Wang\*, Jiarui Wang\*, Huiyu Duan\*, Jiaxiang Kang, Guangtao Zhai, Xiongkuo Min†  
Institute of Image Communication and Network Engineering  
Shanghai Jiao Tong University, Shanghai, China

### 1. Model Details

#### 1.1. Evaluated Models

We evaluated 9 Single-Image (SE) editing models and 4 Multi-Image (ME) editing models, as shown in the main paper. For nano-banana, we obtained evaluation results through its official API interface. For all other models (including Qwen-Image-Edit-2509, Bagel, Step1X-Edit, UniPic-2, FLUX.1-Kontext-dev, Omnigen2, ICEdit, GoT, instruct-pix2pix, and DreamOmni2), we used their publicly available checkpoints. During inference, we uniformly adopted the default inference configurations provided in the models’ official repositories or `diffusers` library. No additional parameter tuning was performed, ensuring a fair and standardized evaluation.

#### 1.2. Evaluation Tools

Our evaluation pipeline utilizes both generalist and specialist models. For the Generalist Evaluator, all LMM-based evaluation pipelines detailed in Appendix 5 (LMM VQA-5Level, LMM VQA-2Level, and LMM Multi-Question VQA) were conducted using Qwen3-VL-8B-Instruct. For the Specialist Tools, we utilized Q-Inspire, ArtiMuse, GOT-OCR2.0, Sa2VA, and DINOv3, all employed with their default public settings.

### 2. Human Preference Annotation Details

To rigorously validate the alignment of I2I-Bench’s automated evaluation methods (especially the LMM evaluators) with genuine human perception, we conducted a large-scale human preference annotation experiment.

**Annotator Guidelines.** We employed a pairwise comparison format. Annotators were shown images generated by two different models (*e.g.*, Model A and Model B) for the same prompt and dimension, and were asked to select “A is better,” “B is better,” or “Tie.” The most critical principle was that annotators were strictly instructed to judge *solely based on the single dimension being evaluated*, and

to disregard all other quality aspects. For example, when evaluating “Subject Identity Fidelity,” annotators were told: “You must choose the image that better preserves the subject’s identity (*e.g.*, face, features). Even if the other image has better blending or fewer artifacts, you must penalize it if the subject’s identity is distorted.” Conversely, for “Blending Naturalness,” the guidance was: “You must focus only on whether the transition of the edited region is smooth and seamless. Even if the image did not follow the instruction perfectly, you should choose it if its blending is superior.” We provided detailed manuals with positive and negative examples for all 30 fine-grained dimensions to ensure a consistent understanding among all annotators.

**Quality Assurance.** To ensure the accuracy and consistency of the annotated data, we implemented a rigorous, multi-step quality assurance process. First, we (the authors) prepared clear definitions, criteria, and “what to look for” vs. “what to ignore” examples for all 30 dimensions. Second, before the main task, all annotators had to complete a “Pre-Labeling Trial” of approximately 30 pairwise comparison samples. Third, we reviewed these trial results and provided one-on-one feedback to annotators to clarify any misunderstandings and unify the standards. Fourth, we iterated on the guidelines, supplementing them with confusing cases found during the trial. Finally, after all annotations were complete, we (the authors) randomly sampled 20% of the total annotations from each dimension for post-labeling checks. If the error rate (disagreement with the authors) in this sample exceeded 10%, all data for that dimension was considered invalid and re-assigned to a different annotator for re-labeling. This strict training and QA process ensures our human preference data is highly reliable for alignment validation.

### 3. Rationale for Evaluation Methods

In I2I-Bench, we firmly contend that a single, monolithic evaluation method (*e.g.*, a “Pure LMM” score) is insufficient to capture the full spectrum of image editing quality. The 30 dimensions in our benchmark are decoupled, targeting distinct facets of quality ranging from objective technical fidelity to complex cognitive reasoning.

---

\*Equal contribution

†Corresponding author

To achieve the highest possible alignment with human judgment, we designed a hybrid evaluation system that explicitly matches the evaluation needs of each dimension to the most appropriate tool. Our methodology is built on a “best-tool-for-the-job” principle, which can be categorized into three distinct evaluation pathways.

### 3.1. Specialist Models: For Objective and Perceptual Quantification

For well-defined, global image properties, mature specialist models provide the most stable, objective, and unbiased scores.

**Dimensions:** Overall Image Quality, Aesthetic Quality.

**Method:** Specialist Models (Q-Insight, ArtiMuse).

**Rationale:** These dimensions require assessing global, technical (e.g., clarity, noise) or artistic (e.g., composition, color harmony) quality. Unlike an LMM, whose judgment (as in our “Pure LMM” baseline) can be easily biased by the \*semantic content\* of an edit (e.g., an LMM might give a high score to a “semantically correct” but blurry edit), these specialist tools are trained on specific, large-scale datasets (like KonIQ-10k) to provide consistent quantitative scores for these precise attributes, aligning closely with human perception of these specific factors.

### 3.2. Hybrid LMM-Specialist Pipelines: For High-Fidelity and Content-Specific Tasks

This hybrid approach is a core innovation of I2I-Bench. It combines the semantic understanding of LMMs (“what to look at”) with the precise quantification of specialist tools (“how to measure it”), overcoming the limitations of using either one alone.

#### 3.2.1. Hybrid OCR: For Textual Accuracy

**Dimensions:** Text Content & Style Accuracy.

**Method:** Hybrid LMM VQA-5Level + Specialist OCR (GOT-OCR2.0).

**Rationale:** We do not use a “Pure LMM” (baseline) for this dimension due to its poor performance in precise OCR. LMMs frequently “hallucinate”—misreading, omitting, or inventing text. This dimension involves two distinct sub-tasks: (1) **Content:** Is the spelling correct? (2) **Style:** Are the font, position, and color correct?

- For **Content (1)**, a binary, objective task, the specialist OCR model (GOT-OCR2.0) provides a “ground truth” score for content accuracy ( $S_c$ ).

- For **Style (2)**, a subjective, semantic judgment, the LMM is the ideal tool (via LMM VQA-5Level, yielding  $S_s$ ).

Our hybrid pipeline (Eq. 5) uses the objective OCR score to “gate” the subjective LMM style score, ensuring a model does not receive a high score for generating beautifully styled but *incorrectly spelled* text.

**Further Justification for the Fusion Strategy:** We select the piecewise function in Eq.4 (from the main paper) based on a careful consideration of human perceptual mechanisms, rather than a simpler combination.

- **Inadequacy of Additive Fusion:** A simple additive combination (e.g.,  $S_c + S_s$ ) is fundamentally unsuitable. It fails to implement a “gating” mechanism, meaning a perfect style score ( $S_s = 1.0$ ) could erroneously compensate for completely incorrect content (e.g.,  $S_c = 0.1$ ), leading to a high score for a failed edit.
- **Why Piecewise is Superior to Simple Multiplication:** As you correctly noted, a simple multiplicative fusion (e.g.,  $S_c \times S_s$ ) does provide a basic gating effect. However, we found it insufficient as it fails to capture the *non-linear* nature of human perception. Our empirical observations suggest that human evaluators do not assess textual accuracy on a continuous linear scale. Instead, they tend to “bucket” the results into coarse-grained categories:

1. Perfectly Correct ( $S_c \approx 1.0$ )
2. Mostly Correct / Minor Error (e.g.,  $S_c \geq 0.8$ )
3. Partially Correct / Significant Errors (e.g.,  $S_c \approx 0.5$ )
4. Completely Wrong ( $S_c < 0.3$ )

A simple multiplication treats the difference between  $S_c = 0.9$  and  $S_c = 0.8$  the same as the difference between  $S_c = 0.6$  and  $S_c = 0.5$ . In contrast, our piecewise function is explicitly designed to model these discrete human perceptual thresholds, applying a gentle penalty for “mostly correct” results while applying a severe penalty once the accuracy drops below a “failure” threshold.

- **Disparity in Task Objectivity:** This design also accounts for the different nature of the sub-tasks. Rendering correct content ( $S_c$ ) is an objective, difficult, and high-stakes task strictly measured by OCR. Rendering style ( $S_s$ ) is a more subjective and, comparatively, lower-difficulty task evaluated by the LMM. The objective  $S_c$  score must therefore serve as a robust, non-negotiable filter for the subjective  $S_s$  score.
- **Empirical Validation:** The specific thresholds (e.g., 0.8, 0.6) and their corresponding multipliers (0.8, 0.5, 0.1) in Eq. ?? were chosen empirically. During our development, we tested several fusion configurations (including simple multiplication) and found that this specific piecewise setup yielded the **highest Pearson correlation** with our human preference annotations, validating its superior alignment with human judgment.

### 3.2.2. Hybrid Feature Matching: For Fidelity and Identity Preservation

**Dimensions:** Non-Edited Region Fidelity, Subject Identity Fidelity, Subject Consistency, Detail Fidelity/Preservation.

**Method:** Hybrid LMM-Specialist (Sa2VA + DINOv3).

**Rationale:** We do not use a “Pure LMM” (baseline) for these dimensions due to “semantic drift.” An LMM judges high-level *concepts* (e.g., it might consider a *different person* in the same clothes as having high “subject identity”), not true *perceptual similarity*.

- Conversely, simple pixel-level metrics (e.g., PSNR or LPIPS) fail to capture *feature-level* identity.
- Our hybrid pipeline (Eq. 2) leverages the LMM (via Sa2VA) for its strength: **semantic segmentation** (to identify *which* pixels correspond to the “subject” or “non-edited background”).
- It then leverages the specialist model (DINOv3) for its strength: **feature-level comparison** (extracting and comparing feature vectors from those segmented regions). This provides a quantitative, robust score for fidelity that neither an LMM nor a simple metric could achieve.

### 3.3. Generalist LMM Pipelines: For Semantic and Cognitive Judgments

For dimensions where the core task is semantic understanding, logical reasoning, or subjective assessment, the LMM is the ideal, and often only, tool. We further refine this by selecting different LMM VQA structures based on the *nature* of the judgment required.

#### 3.3.1. 5-Level VQA (for Subjective, Holistic Scoring)

**Dimensions:** Blending Naturalness, Editing Artifacts, Instruction Following (Macro).

**Method:** LMM VQA-5Level (Eq. 1).

**Rationale:** These dimensions are inherently **subjective and holistic**. There is no “binary” correct answer for Blending Naturalness or Editing Artifacts; they exist on a spectrum. The 5-level weighted score (from “excellent” to “bad”) is designed to capture this nuanced, perceptual “feel.” Similarly, Instruction Following (Macro) assesses the overall *gist* and *intent* of the edit, making it a perfect choice for a 5-level holistic judgment.

#### 3.3.2. 2-Level VQA (for Binary, Factual Success)

**Dimensions:** Object Manipulation Accuracy, Local Attribute Accuracy, Action/State Change Accuracy, Spatial Accuracy, World Knowledge & Reasoning (SE).

**Method:** LMM VQA-2Level (Eq. 4).

**Rationale:** This targets factual, binary (Yes/No) task success, primarily in Single-Image (SE) edits. The edit either *happened as specified* (Yes) or *it did not* (No).

- “Was the horse changed to *white*?” (Yes/No).
- “Was the *correct* mayor’s statue added?” (Yes/No).
- “Was the object placed to the *left* of the target?” (Yes/No).

A 2-Level (Yes/No) VQA is the most direct and unambiguous way to measure this **knowledge-retrieval** or **instruction-execution** semantic correctness. **Crucially, we are not testing the LMM’s own knowledge; we use the LMM VQA to judge if the “edited image” matches our “pre-defined correct answer set.”** This ensures the **objectivity of the evaluation**.

#### 3.3.3. Multi-Question VQA (for Complex, Decomposed Reasoning)

**Dimensions:** Physical Plausibility, Composition & Interaction.

**Method:** LMM Multi-Question VQA (Eq. 3).

**Rationale:** These are cognitively complex dimensions. Asking an LMM for a single 1-5 score (i.e., the “Pure LMM” baseline) is **unreliable**. An LMM suffers from “attention bias” when evaluating complex scenes; it may focus only on the edited subject while completely ignoring its incorrect shadow or perspective.

- Our Multi-Question VQA method acts as a “**forced attention mechanism**.” It *decomposes* the complex concept into a series of simple, verifiable sub-questions (e.g., “1. Is the shadow direction of the new object correct?” “2. Is the perspective of the new object consistent?”).
- This forces the LMM to perform a more robust, “chain-of-thought”-like analysis across multiple facets (lighting, shadows, perspective, occlusion). The resulting score, an aggregation of “Yes” answers (Eq. 3), is far more reliable and fine-grained than a single, potentially biased, holistic judgment.

#### 3.3.4. LMM VQA (for Multi-Image Abstract Cognition & Cross-Image Relations)

These are the most difficult, SOTA-challenging dimensions in I2I-Bench, characterized by their need for **relational understanding** and **semantic reasoning across multiple source images**. No specialist model can perform such tasks, making the LMM the only tool for evaluation. We match the VQA structure to the nature of each task:

**Dimension 1: Cross-Source Attribute/Pose Transfer**

- **Method:** LMM VQA-2Level (Binary Factual Judgment).
- **Rationale:** This task (*e.g.*, “Transfer pose from A in Image 1 to B in Image 2”) is a purely “**relational instruction**.” The LMM must: (1) identify the source attribute (pose) in Image 1; (2) identify the target (B) in Image 2; and (3) judge if B in the generated image has *factually adopted* A’s pose. No specialist model (*e.g.*, pose-estimator) can understand the semantic command “to transfer.” This is a binary (Yes/No) cross-image semantic verification, making 2-Level VQA most appropriate.

#### Dimension 2: Inter-Subject Consistency

- **Method:** LMM VQA-5Level (Subjective Spectral Judgment).
- **Rationale:** This task assesses “how harmonious subjects from different sources look when composited together.” This is distinct from Sec 2.2’s Subject Consistency (which measures fidelity to the *source*). This is a high-level, **scene-wide artistic and semantic judgment**. The LMM must evaluate if lighting, scale, and artistic style (*e.g.*, a photorealistic person vs. an anime person) are consistent *within the new scene*. This is a subjective “feel”, not a binary (Yes/No) question, making the 5-Level VQA spectrum the best fit.

#### Dimension 3: World Knowledge & Reasoning (ME)

- **Method:** LMM VQA-2Level (Binary Factual Judgment).
- **Rationale:** This task, unlike its SE “knowledge retrieval” counterpart, demands “**abstract logical reasoning**” (*e.g.*, map inference, Sudoku solving, logical combinations based on multiple images). The task occurs in *logical space*, not pixel space. The LMM is the only tool that can understand “logic”. In line with Sec 3.2, to ensure objectivity, we **use the LMM VQA to judge if the “edited image” satisfies our “pre-defined correct answer set”** (*e.g.*, the correct Sudoku solution, the correct city name from the map). This makes the evaluation an objective (Yes/No) check, for which 2-Level VQA is ideal.

### 4. Prompt Quota per I2I-Bench Evaluation Dimension

This section details the exact number of prompts used to calculate the final scores for each model across all 30 dimensions in the proposed I2I-Bench evaluation suite. The total number of prompts is 1000, split equally between 500 Single-Image Editing (SE) prompts and 500 Multi-Image Editing (ME) prompts.

Table 1. Prompt Quota for Single-Image Editing (SE) Dimensions.

| English Dimension Name        | Prompt Quota |
|-------------------------------|--------------|
| Aesthetic Quality             | 500          |
| Blending Naturalness          | 500          |
| Editing Artifacts             | 500          |
| Image Quality                 | 500          |
| Instruction Following (Macro) | 500          |
| Non-Edited Element Fidelity   | 500          |
| Physical Plausibility         | 500          |
| Composition & Interaction     | 350          |
| Object Manipulation Accuracy  | 332          |
| Local Attribute Accuracy      | 282          |
| Spatial Accuracy              | 275          |
| Subject Identity Fidelity     | 233          |
| Text Content & Style Accuracy | 100          |
| World Knowledge & Reasoning   | 100          |
| Action/State Change Accuracy  | 86           |

Table 2. Prompt Quota for Multi-Image Editing (ME) Dimensions.

| English Dimension Name               | Prompt Quota |
|--------------------------------------|--------------|
| Aesthetic Quality                    | 500          |
| Blending Naturalness                 | 500          |
| Composition & Interaction            | 500          |
| Detail Fidelity/Preservation         | 500          |
| Image Quality                        | 500          |
| Instruction Following (Macro)        | 500          |
| Non-Edited Element Fidelity          | 500          |
| Physical Plausibility                | 500          |
| Subject Consistency                  | 500          |
| Subject Extraction & Composition     | 500          |
| Spatial Accuracy                     | 476          |
| Inter-Subject Consistency            | 412          |
| Text Content & Style Accuracy        | 200          |
| Cross-Source Attribute/Pose Transfer | 126          |
| World Knowledge & Reasoning          | 100          |

### 5. Comparative Analysis with LMM4Edit

To demonstrate the superiority of our proposed evaluation suite, we conducted a comparative analysis against LMM4Edit, a recent image editing evaluation metric based on LMMs. We performed inference using LMM4Edit on the Single-Image Editing component of I2I-Bench. While LMM4Edit provides pre-trained weights corresponding to multiple dimensions, we observed that not all checkpoints were fully applicable within our testing environment due to technical inconsistencies. Consequently, we selected one of the viable weight versions to conduct the comparative experiment.

Table 3 presents a detailed comparison of Pearson’s Rho correlations between LMM4Edit and our method (Ours). The results unequivocally demonstrate that I2I-Bench sig-



nificantly outperforms LMM4Edit across the vast majority of evaluation dimensions. Specifically:

- **Superior Overall Alignment:** Our method achieves a remarkably high average correlation of **0.9425** (excluding nan), compared to 0.5968 for LMM4Edit. This substantial gap validates the effectiveness of our "Specialist-Generalist Hybrid" evaluation strategy in aligning with human perception.
- **Robustness in Fundamental Dimensions:** LMM4Edit exhibits critical failures in fundamental quality assessment. Notably, it shows a negative correlation (-0.4568) in *Blending-Naturalness* and a weak correlation (0.2508) in *Image-Quality*, failing to correctly penalize artifacts. In contrast, our method achieves high consistency scores of 0.8866 and 0.9033, respectively, in these dimensions.
- **Reasoning Capabilities:** In complex tasks such as *World-Knowledge-Reasoning* and *Text-Content-Style-Accuracy*, our method demonstrates overwhelming superiority due to the integration of specialized tools (OCR and VQA specialists), whereas the pure LMM-based approach of LMM4Edit struggles significantly.

In conclusion, this experiment confirms that I2I-Bench provides a far more robust, accurate, and human-aligned evaluation framework compared to existing LMM-based metrics.

Table 3. Comparison of Pearson’s Rho correlation with human preference between LMM4Edit and our method (Ours) on the I2I-Bench Single-Image Editing task. Our method demonstrates significant superiority across almost all dimensions.

| Dimension                    | LMM4Edit ( $\rho$ ) | Ours ( $\rho$ ) | Gap ( $\Delta$ ) |
|------------------------------|---------------------|-----------------|------------------|
| Image-Quality                | 0.2508              | <b>0.9033</b>   | +0.6525          |
| Aesthetic-Quality            | 0.7846              | <b>0.9889</b>   | +0.2043          |
| Blending-Naturalness         | -0.4568             | <b>0.8866</b>   | +1.3434          |
| Non-Edited-Element-Fidelity  | 0.5984              | <b>0.9019</b>   | +0.3035          |
| Subject-Identity-Fidelity    | 0.8210              | <b>0.9133</b>   | +0.0923          |
| Physical-Plausibility        | 0.7683              | <b>0.8055</b>   | +0.0372          |
| Editing-Artifacts            | 0.6551              | <b>0.9006</b>   | +0.2455          |
| Instruction-Following-Macro  | 0.6266              | <b>0.9960</b>   | +0.3694          |
| Object-Manipulation-Accuracy | 0.7559              | <b>0.9787</b>   | +0.2228          |
| Local-Attribute-Accuracy     | 0.7445              | <b>0.9877</b>   | +0.2432          |
| Action-State-Change-Accuracy | 0.5996              | <b>0.9839</b>   | +0.3843          |
| Spatial-Accuracy             | <b>0.9655</b>       | 0.9303          | -0.0352          |
| Text-Content-Style-Accuracy  | 0.5873              | <b>0.9979</b>   | +0.4106          |
| World-Knowledge-Reasoning    | 0.2885              | <b>0.9628</b>   | +0.6743          |
| Composition-Interaction      | 0.9631              | <b>0.9997</b>   | +0.0366          |
| <b>Average Correlation</b>   | 0.5968              | <b>0.9425</b>   | <b>+0.3457</b>   |

## 6. Evaluation Pipeline and Prompt Details

This section details the automated hybrid evaluation methods used to assess the 30 fine-grained dimensions in I2I-Bench. The “Generalist” Large Multimodal Model (LMM) used for all evaluations is Qwen3-VL-8-Instruct.

### 6.1. Single-Reference (SE) Evaluation Dimensions

#### 6.1.1. SE: Common Dimensions

These 7 dimensions assess the fundamental quality of all Single-Reference (SE) editing tasks.

**1. Overall Image Quality & 2. Aesthetic Quality** **Pipeline Type:** Specialist Models. **Tools:** Q-Inight, ArtiMuse. **Prompts:** N/A (Scores are obtained directly from the Specialist models).

**3. Blending Naturalness** **Pipeline Type:** LMM VQA-5Level. **Tools:** Qwen3-VL-8-Instruct.

#### System Prompt:

You are an expert evaluator of image photorealism and coherence. Your specific task is to assess the realism of the edit itself. Evaluate how seamlessly the modified or added elements integrate with the rest of the image in terms of lighting, shadows, perspective, and texture. A high rating means the final image looks natural and plausible, as if it were a single, untouched photograph. Do not focus on whether the instruction was followed literally. Your response must be one of the following five words directly: excellent, good, fair, poor, bad. Do not add any introductory phrases.

#### User Prompt (Q):

Please evaluate the realism and coherence of the edit in the ‘Generated Image’ compared to the ‘Source Images’. Assess how seamlessly the edited elements integrate with the rest of the image in terms of lighting, shadows, and overall plausibility. Your response must begin with one of the five rating words: excellent, good, fair, poor, bad.

**4. Generative/Editing Artifacts** **Pipeline Type:** LMM VQA-5Level. **Tools:** Qwen3-VL-8-Instruct.

#### System Prompt:

You are an expert evaluator of image editing quality. You will be given an 'Original Image', an 'Editing Instruction', and the resulting 'Edited Image'. Your task is to assess the 'Edited Image' for *\*unwanted artifacts\** introduced *\*during the editing process\**, not artifacts that were in the original.

**\*\*Crucially\*\*:** If the instruction is stylistic (e.g., 'turn into a painting', 'make it look like Van Gogh'), *\*do not\** penalize the image for looking 'unnatural'. Instead, judge if the *\*application\** of the style is flawed (e.g., distorted, incomplete, blotchy).

Also, heavily penalize edits that *\*fail to preserve\** unedited regions (e.g., if the instruction is 'change the woman's hat', her face and the background should remain unchanged).

Based on the *\*severity\** of these *\*unwanted\** artifacts, rate the 'Edited Image' using *\*only\** one of the following five words:

1. excellent (Flawless edit. The instruction is followed perfectly with *\*zero\** unwanted artifacts. Unedited areas are perfectly preserved.)
2. good (Minor, hard-to-notice artifacts. The edit is successful but may have tiny imperfections upon close inspection.)
3. fair (Noticeable artifacts. The edit is mostly successful, but there are visible flaws like slight warping, minor texture loss, or imperfect blending.)
4. poor (Significant, obvious artifacts. The edit is flawed, with clear distortions, unnatural warping, or significant damage to unedited areas.)
5. bad (Extreme, severe artifacts. The edit is a total failure, resulting in a grotesque, distorted, or nonsensical image.)

**User Prompt (Q):**

Based on the instruction, how severe are the *\*unwanted artifacts\** in the 'Edited Image'?

## 5. Instruction Following (Macro) Pipeline Type: LMM VQA-5Level. Tools: Qwen3-VL-8-Instruct.

**System Prompt:**

You are a meticulous evaluator specializing in text-to-image editing. Your sole task is to assess how accurately the edited image reflects the given instruction, based on the original image. Focus exclusively on whether the edit described in the instruction was performed correctly. You must ignore all other factors, such as overall image quality or any unintended changes in areas not mentioned in the instruction. Your response must be one of the following five words directly: excellent, good, fair, poor, bad. Do not add any introductory phrases.

**User Prompt (Q):**

Please evaluate whether the 'Generated Image' successfully implements the following instruction. Instruction: "prompt". Your response must begin with one of the five rating words: excellent, good, fair, poor, bad.

## 6. Non-Edited Region Fidelity Pipeline Type: Hybrid LMM-Specialist. Tools: LMM (Qwen3-VL-8-Instruct) + Sa2VA + DINOv3. Description: The LMM generates a segmentation command for the "edited" region. The mask is then **inverted (NOT)** to isolate the *non-edited region*.

**LMM Segmentation Command Prompt (Q):**

You are an image segmentation assistant. Compare <image\_1> (Original Image) and <image\_2> (Edited Image), and considering the editing instruction: "edit\_instruction", generate a text

command to segment the edited or modified region in the image. Your response MUST begin with "Please segment". This command will be used to segment the edited image in isolation. Therefore, ensure the command is clear, focuses only on the edited image, and makes no reference to the original image, as this would confuse the segmentation model.

## 7. Physical Plausibility Pipeline Type: LMM Multi-Question VQA (Multi-VQA). Tools: Qwen3-VL-8-Instruct.

### QG (Question Generation) Prompt:

You are an expert in physical plausibility evaluation. Your task is to design a set of (5 to 7) precise, specific binary (Yes/No) questions based on the given original image and an editing instruction, to evaluate whether the edited image is physically plausible.

When designing questions, strictly follow this thought process and principles:

1. **\*\*Analyze Scene & Instruction\*\***: \* **\*\*Identify Subject & Action\*\***: What object (subject) is being manipulated (added, removed, replaced, attribute changed)? \* **\*\*Analyze Physical Context\*\***: Observe the original image to identify relevant physical properties and environmental factors: e.g., lighting direction, shadows, reflective surfaces, support relationships, rigid vs. soft bodies.
2. **\*\*Generate Questions\*\***: Based on the analysis, generate questions from the following physical dimensions. Each must be a closed-ended Yes/No question. \* **\*\*Optics (Shadows, Reflections)\*\***: If an object was added/moved, is its new shadow consistent with the scene's light source? If an object was removed, is its shadow

also gone? Are reflections on nearby surfaces correctly updated? \* **\*\*Mechanics (Deformation, Support)\*\***: If a heavy object is placed on a soft surface, does the surface show plausible deformation? If a supporting object is removed, does the object it supported (e.g., a vase on a table) defy gravity? \* **\*\*State Transition (Weather, State)\*\***: If the instruction changes the weather (e.g., 'make it winter'), are all elements (trees, ground) consistently updated (e.g., covered in snow)?

3. **\*\*Output Format\*\***: Please output a JSON-formatted string containing a list of questions. The JSON object should have a key named "physical\_questions" with a value that is a list of strings. Example: { "physical\_questions": [ "Question 1: ...?", "Question 2: ...?", "Question 3: ...?" ] } Now, please generate physical plausibility evaluation questions based on the following image and instruction. Instruction: "prompt".

### QA (Question Answering) Prompt:

You are an expert in physical plausibility evaluation. Please carefully observe the provided image and judge based on the following question. Question: "question" Please answer with only one word based on visual evidence: Yes or No.

### 6.1.2. SE: Specific Dimensions

These 8 dimensions assess the execution quality of specific instructions.

## 8-11. Object Manipulation, Local Attribute, Action/State Change, Spatial Accuracy Pipeline Type: LMM VQA-2Level. Tools: Qwen3-VL-8-Instruct.

### System Prompt:

You are an expert in evaluating image editing. Your task is to determine if the edited image successfully implements the given instruction compared to the original image. Focus solely on whether the instruction was achieved. Answer strictly and only with 'Yes' or 'No'.

#### User Prompt (Q):

Instruction: "prompt". Does Image 2 successfully implement the instruction compared to Image 1? Answer Yes or No.

**12. Text Content & Style Accuracy Pipeline Type:** Multi-step Hybrid Pipeline. **Tools:** GOT-OCR2.0 + LMM (Qwen3-VL-8-Instruct). **Description:** GOT-OCR2.0 evaluates content accuracy ( $S_c$ ). The LMM then uses a VQA-5Level pipeline to evaluate style and position ( $S_s$ ).

#### LMM Style/Position Prompt (Q):

You are an expert evaluator for AI-generated images, specializing in text rendering. Your task is to evaluate how well an image follows the text-related **style** and **position** instructions from a user prompt.

**CRITICAL RULE:** Do NOT evaluate the text's spelling or accuracy. Assume the spelling is correct, even if it is not. Your score must ONLY reflect the non-accuracy requirements (like font style, color, placement, etc.).

You will be given:

- [User Prompt]:** The original prompt used to generate the image.
- [Target Text]:** The specific text string that was requested.
- [Image]:** The generated image.

**Step 1: Analyze Requirements**

First, analyze the [User Prompt] to identify the specific requirements for:

- Text Style:** What instructions were given for the text's appearance (e.g., "neon", "handwritten", "bold", "red

- color", "glowing", "artistic font")?
- Text Position:** What instructions were given for the text's location (e.g., "on the sign", "in the top-left corner", "on the t-shirt")?

**Step 2: Evaluate Image against Requirements**

Compare the text in the [Image] against the non-accuracy requirements you identified. Remember to IGNORE spelling errors.

**Step 3: Assign a Single Score (1-5)**

Provide a single, holistic score for **Style** and **Position Compliance** based on this rubric.

- [5] Excellent Match: All specified style and position instructions were followed perfectly.
- [4] Good Match: All specified instructions were followed, but with minor deviations.
- [3] Partial Match: The core idea of **at least one** instruction was attempted but executed poorly, OR one major instruction was followed while another was missed.
- [2] Poor Match: At least one specified instruction was clearly ignored or failed.
- [1] No Match: All specified style and position instructions were completely ignored.

**Step 4: Provide Output in JSON Format**

Provide your evaluation in a strict JSON format. Do not include any text outside the JSON block.

**JSON Output Format:**

```
{
  "analysis": {
    "style_requirement": "...",
    "position_requirement": "...",
    "image_observation": "...",
    "reasoning": "...",
    "score": [1-5]
  }
}
```

**13. World Knowledge & Reasoning Pipeline Type:** LMM VQA-2Level. **Tools:** Qwen3-VL-8-Instruct.

#### System Prompt:

You are an expert evaluator for image editing based on multiple reference images. Your task is to determine if the 'Edited Image' successfully implements the requested change described in the 'Instruction', based *specifically* on the 'Evaluation Criteria (Hint)'. Compare the 'Reference Images' and 'Edited Image'. Your response must be *only* the single word 'Yes' or 'No'. 'Yes' = The edit was successfully implemented according to the hint. 'No' = The edit was not successfully implemented according to the hint.

#### User Prompt (Q):

```
**Instruction (Prompt):** prompt
**Evaluation Criteria (Hint):**
hint
Based on ALL reference images,
the instruction, and the specific
criteria in the hint, has the edit
been successfully implemented in
the 'Edited Image'? Answer with
only 'Yes' or 'No'.
```

**14. Subject Identity Fidelity Pipeline Type:** Hybrid LMM-Specialist. **Tools:** LMM (Qwen3-VL-8-Instruct) + Sa2VA + DINOv3. **Description:** The LMM generates a command to segment regions that **"should remain unchanged"** (e.g., the face, if the instruction is 'change the shirt'). The mask is **not inverted**.

#### LMM Segmentation Command Prompt (Q):

You are an expert in image editing analysis. Given an original image, an edited image, and the editing instruction, identify all distinct main subjects or regions present in the original image that *should remain unchanged* according to the instruction. Your output MUST BE ONLY a JSON list of strings. Each string must be a separate segmentation command for one distinct subject/region, in the format 'Please segment [subject

name in English]'.  
For example: ["Please segment background sky", "Please segment mountains", "Please segment main building"]

**15. Composition & Interaction Pipeline Type:** LMM Multi-Question VQA. **Tools:** Qwen3-VL-8-Instruct.

#### QG (Question Generation) Prompt:

You are an expert in visual arts and composition evaluation. Your task is to design a set of (5 to 7) precise, specific binary (Yes/No) questions based on the given original image and an editing instruction, to evaluate whether the edited image is plausible in terms of **composition, perspective, scale, and interaction**. When designing questions, strictly follow this thought process and principles:

- Analyze Scene & Instruction:**
  - Identify Subject & Action:** What object (subject) is being manipulated (added, removed, replaced, attribute/pose changed)?
  - Analyze Visual Context:** Observe the original image to identify key visual elements: scene perspective (close-up, long-shot, eye-level), key objects, spatial layout (foreground/background), and interaction area implied by the instruction.
- Generate Questions:**
  - Composition & Placement:** Is the new/moved object in a logical position? Is its occlusion (in front of/behind other objects) correct?
  - Perspective & Scale:** Is the scale of the new/modified object consistent with other objects in the scene? Does its perspective

match the scene's perspective? \*  
**\*\*Interaction & Naturalness\*\***:  
 If a pose was changed, is it anatomically natural? If objects are interacting (e.g., hand holding a balloon), is the contact point believable?  
 3. **\*\*Output Format\*\***: Please output a JSON-formatted string containing a list of questions. The JSON object should have a key named "composition\_questions" with a value that is a list of strings. Now, please generate composition and interaction plausibility evaluation questions based on the following image and instruction. Instruction: "prompt".

**QA (Question Answering) Prompt:** (Reused from SE Physical Plausibility).

## 6.2. Multi-Reference (ME) Evaluation Dimensions

These 15 dimensions evaluate complex multi-image editing tasks.

### 6.2.1. ME: Common Dimensions

These 9 dimensions are shared with the SE category.

**1–5. Aesthetic Quality, Blending Naturalness, Editing Artifacts, Image Quality, Instr. Following (Macro) Prompts:** Reused from the corresponding SE definitions.

**6. Spatial Accuracy Prompts:** Reused from the SE LMM VQA-2Level definition.

**7. Composition & Interaction Pipeline Type:** LMM Multi-Question VQA.

**QG Prompt (ME-Specific):**

You are an expert in visual arts and composition evaluation. Your task is to design a set of (5 to 7) precise, specific binary (Yes/No) questions based on \*multiple\* given source images (labeled Figure 1, Figure 2, ...) and an editing instruction, to evaluate whether the \*final composited image\* is plausible in terms of **\*\*composition, perspective, scale, and interaction\*\***.

When designing questions, strictly follow this thought process and principles:

1. **\*\*Analyze Scene & Instruction\*\***: \* **\*\*Identify Sources & Composition\*\***: What elements are extracted from which images? How are they combined, modified, and placed? \* **\*\*Analyze Visual Context\*\***: Check perspective, scale, and interaction. Does the instruction require interaction (e.g., A sits on B)?
2. **\*\*Generate Questions\*\***: \* **\*\*Composition & Placement\*\***: Are elements placed logically (e.g., not floating)? Is occlusion correct? \* **\*\*Perspective & Scale\*\***: Is the scale of an element from Fig 1 consistent with the scene from Fig 2? Do all elements share a consistent perspective? \* **\*\*Interaction & Naturalness\*\***: If a pose was changed to interact (e.g., sit on a chair), is the final pose natural? Is the physical contact believable?
3. **\*\*Output Format\*\***: Please output a JSON-formatted string... The JSON object should have a key named "composition\_questions"... Now, please generate... questions based on the following \*multiple\* images and the instruction. Instruction: "prompt".

**QA Prompt:** (Reused from SE Physical Plausibility).

**8. Physical Plausibility Pipeline Type:** LMM Multi-Question VQA.

**QG Prompt (ME-Specific):**

You are an expert in physical plausibility evaluation. Your task is to design a set of (5 to 7) precise, specific binary (Yes/No) questions based on \*multiple\* given source images (labeled Figure 1, Figure 2, ...) and an editing instruction, to evaluate whether the \*final composited image\* is

physically plausible.

When designing questions, strictly follow this thought process and principles:

1. **Analyze Scene & Instruction**: \* **Identify Sources & Composition**: What elements are extracted and how are they combined? \* **Analyze Physical Context**: Are the lighting, shadows, and physics consistent \*between\* elements from different sources? \* **Analyze Interaction**: Do elements interact? Do these interactions obey physical laws (support, occlusion, deformation)?
2. **Generate Questions**: \* **Optics (Lighting/Shadows)**: Are the shadows and lighting on all combined elements consistent with a single, unified light source? \* **Mechanics (Support/Deformation)**: If an element from Fig 1 is placed on a soft element from Fig 2, does the surface plausibly deform? Are support structures logical? \* **State Consistency**: If the instruction changes the global state (e.g., 'make it rain'), does this state apply consistently to all elements from all sources?
3. **Output Format**: Please output a JSON-formatted string... The JSON object should have a key named "physical\_questions"... Now, please generate... questions based on the following \*multiple\* images and the instruction.  
Instruction: "prompt".

**QA Prompt:** (Reused from SE Physical Plausibility).

**9. Non-Edited Element Fidelity** Pipeline Type: Hybrid LMM-Specialist.

**LMM Segmentation Command Prompt (Q):**

You are an expert in analyzing complex image editing instructions. Given multiple source images, an edited image, and the instruction,

your task is to identify which specific \*source subjects\* (e.g., 'Luffy from Figure 2', 'Conan from Figure 3') are explicitly instructed to be preserved \*without changes\* (e.g., 'keep their original poses', 'remain unchanged').

For each such non-edited subject you find, output a JSON object containing: 1. 'source\_index': The 0-based index of the source image where this subject originates. 2. 'segmentation\_prompt': A short segmentation command in the format 'Please segment [subject name in English]'.

Your output MUST BE ONLY a JSON list of these objects.

Example: [{"source\_index": 1, "segmentation\_prompt": "Please segment Luffy"}, {"source\_index": 2, "segmentation\_prompt": "Please segment Conan"}] If the instruction modifies \*all\* subjects in some way (e.g., 'put all in new clothes'), output an empty list []. Do not add any text before or after the JSON list.

### 6.2.2. ME: Specific Dimensions

These 6 dimensions are specific to multi-reference tasks.

**1. Cross-Source Attribute/Pose Transfer Pipeline**  
Type: LMM Multi-Question VQA.

**QG Prompt:**

You are an expert in "Attribute and Pose Transfer" evaluation. Your task is to design a set of (5 to 7) precise, specific binary (Yes/No) questions based on \*multiple\* given source images (labeled Figure 1, Figure 2, ...) and an editing instruction, to evaluate whether the \*final composited image\* has **accurately and with high quality** completed the attribute or pose transfer. When designing questions, strictly follow this thought process and

principles:

1. **\*\*Analyze Instruction\*\***: \* **\*\*Identify Source & Target\*\***: What attribute/pose is extracted from which subject (e.g., clothes from A in Fig 1)? \* **\*\*Identify Recipient\*\***: What subject is the attribute/pose applied to (e.g., B in Fig 2)?
2. **\*\*Generate Questions\*\***: \* **\*\*Attribute Transfer\*\***: Is the transferred attribute (e.g., clothing, color) accurately and completely replicated on the target subject? Is the target subject's identity (e.g., face, body shape) preserved? Does the new attribute fit the target's pose naturally? \* **\*\*Pose Transfer\*\***: Is the new pose an exact match to the source pose? Is the target subject's identity preserved while performing the new pose? Is the new pose anatomically plausible for the target subject?
3. **\*\*Output Format\*\***: Please output a JSON-formatted string... The JSON object should have a key named "transfer\_questions"... Now, please generate... questions based on the following \*multiple\* images and the instruction. Instruction: "prompt".

**QA Prompt:** (Reused from SE Physical Plausibility).

## 2. Inter-Subject Consistency Pipeline Type: LMM Multi-Question VQA.

**QG Prompt:**

You are an expert in visual consistency evaluation. Your task is to design a set of (5 to 7) precise, specific binary (Yes/No) questions based on \*multiple\* given source images (labeled Figure 1, Figure 2, ...) and an editing instruction, to evaluate whether the elements from different source images appear visually consistent in the \*final composited image\*. When designing questions, strictly follow this thought process and

principles:

1. **\*\*Analyze Instruction & Sources\*\***: \* **\*\*Identify Extracted Elements\*\***: What is taken from Fig 1? From Fig 2? \* **\*\*Analyze Source Context\*\***: What is the lighting in Fig 1? The style in Fig 2? The perspective in Fig 3? \* **\*\*Analyze Final Scene\*\***: Where are they being combined?
2. **\*\*Generate Questions\*\***: \* **\*\*Lighting Consistency\*\***: Do the highlights and shadows on the element from Fig 1 and the element from Fig 2 look like they are caused by the \*same\* light source in the final image? \* **\*\*Scale & Perspective\*\***: Is the relative scale between the element from Fig 1 and the element from Fig 2 realistic? Do their perspectives match the final scene's horizon line? \* **\*\*Style Consistency\*\***: Do all elements share a unified artistic style (e.g., photographic vs. cartoon)? Is the image quality (sharpness, noise) consistent across elements?
3. **\*\*Output Format\*\***: Please output a JSON-formatted string... The JSON object should have a key named "consistency\_questions"... Now, please generate... questions based on the following \*multiple\* images and the instruction. Instruction: "prompt".

**QA Prompt:** (Reused from SE Physical Plausibility).

## 3. Subject Consistency and Detail Fidelity Pipeline Type: Hybrid LMM-Specialist.

**LMM Segmentation Command Prompt (Q):**

You are an expert in analyzing image editing fidelity for multi-reference composition. Given multiple source images, an edited composite image, and the editing instruction, identify the key visual details (like specific accessories, textures, facial features, fur patterns) of the



subjects \*extracted from the source images\* that are critical for preserving the subjects' identities and should ideally remain unchanged in the edited image. For each identified detail, output a JSON object containing 'source\_index' (the 0-based index of the source image where the detail originates from the provided list) and 'segmentation\_prompt' (a short, specific segmentation command in the format 'Please segment [detail name in English]'). Output ONLY a JSON list of these objects, like `["source_index": 0, "segmentation_prompt": "Please segment detail1", "source_index": 1, "segmentation_prompt": "Please segment detail2"]`. Do not add any text before or after the JSON list.

**4. Subject Extraction & Composition Pipeline Type:** Multi-step (LMM 2-Level + Hybrid). **Description:** A 2-step process. First,  $Score_{count}$  is computed. Second, this is multiplied by the  $Score_{consistency}$  (from the dimension above).

**LMM 2-Level (Count) Prompt (Q):**

You are an image element counter. Carefully observe the "Source Image 1", "Source Image 2", ... and the "Generated Image". Also read the "Instruction" below.  
 Instruction: "instruction"  
 Your task is to: **\*\*Judge only if the "Generated Image" contains all the subjects or objects required for composition by the "Instruction".\*\*** ... **\*\*focus only on the quantity\*\***...  
 Question: Based on the instruction, does the "Generated Image" contain the **\*\*correct number\*\*** of required subjects/objects?  
 Please answer with only one word... Yes or No.

**5. Text Content & Style Accuracy Prompts:** Reused from the SE Text Content & Style Accuracy definition.

**6. World Knowledge & Reasoning Prompts:** Reused from the SE World Knowledge & Reasoning definition.

## 7. More Editing Example

This appendix provides visual examples for the 10 editing task categories defined in I2I-Bench (5 Single-Image Editing categories and 5 Multi-Image Editing categories).

To clearly demonstrate the specific tasks and challenges of each category, each of the following pages (Figure 1 through Figure 10) is dedicated to one category. The "full-page figure" on each page is a composite image that includes the Source Image(s) used for the example, the Prompt (instruction), and one or more representative Output Image(s).

## Object Manipulation

For PEOPLE: In several image editing tasks involving people, we can see that instruct-pix2pix is basically unable to complete the task when processing people, while the other models perform more averagely.

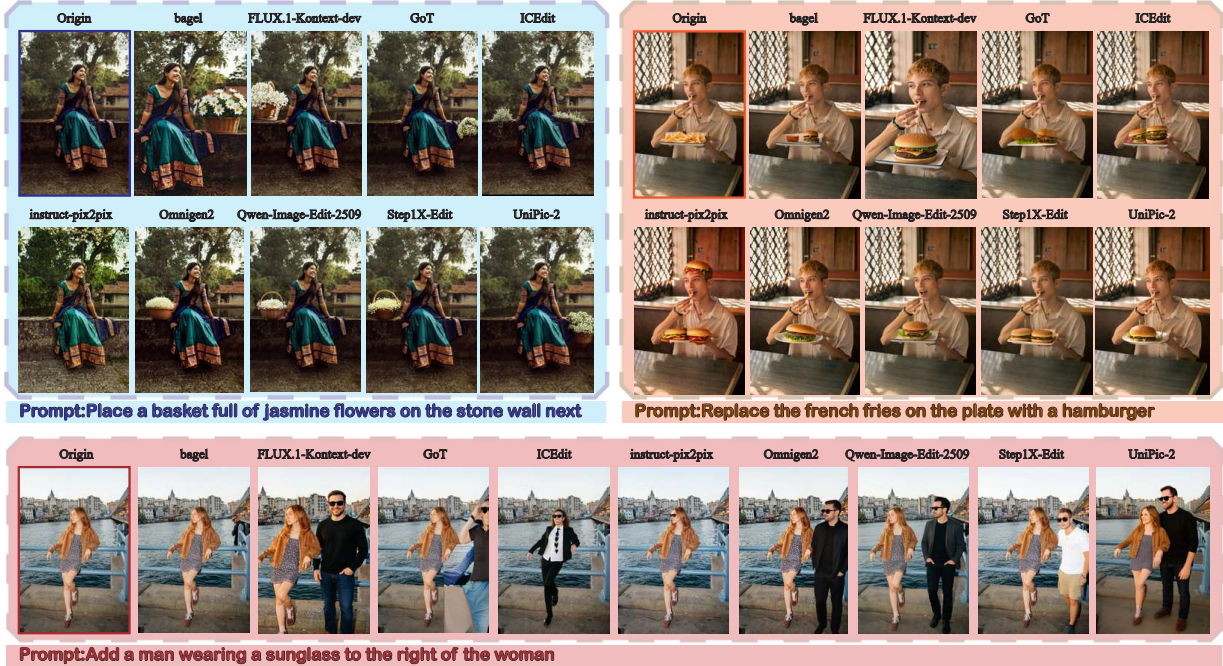

For SCENE: In several image editing tasks related to the scene, we can see that, except for Qwen-Image-Edit-2509, the other models do not perform very well when processing the scene, and always leave editing traces when manipulating objects in the image.

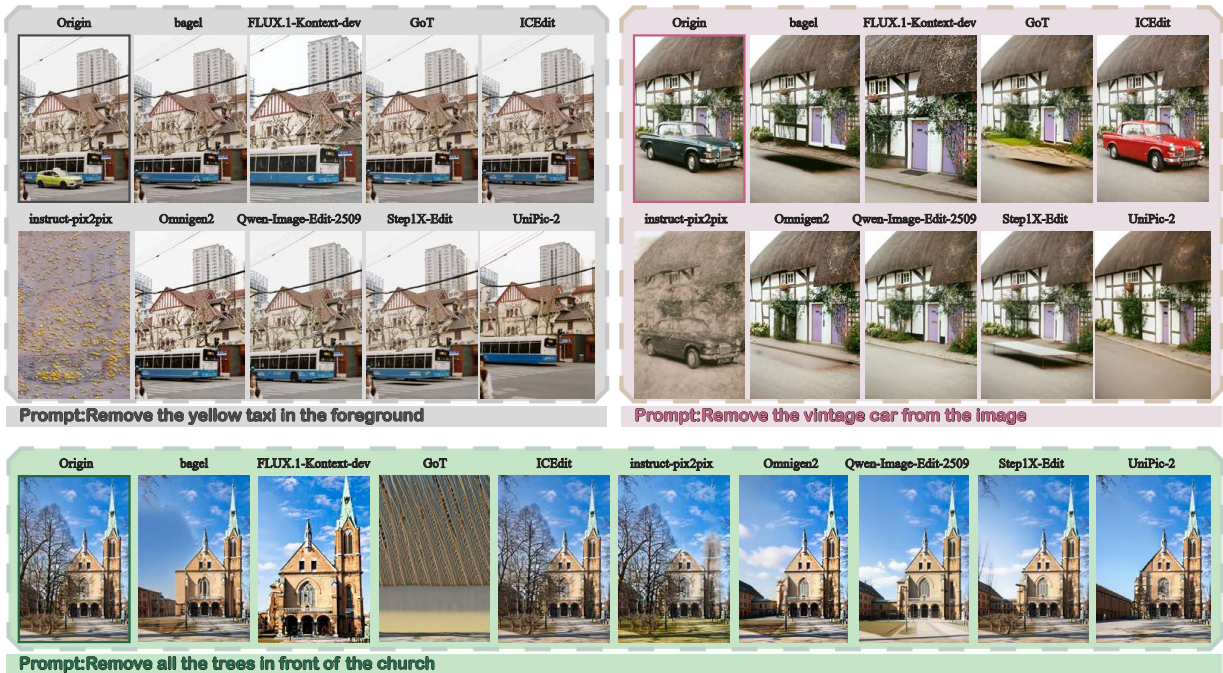

Figure 1. Visual examples for the “Object Manipulation” category. This figure shows multiple test cases from this category, including their corresponding source images, prompts, and output results.



## Local Attribute Editing

For images where the subject occupies a large portion of the image, most models can effectively perform editing tasks for simple tasks. However, for tasks where the prompts are not direct, the models do not perform particularly well.

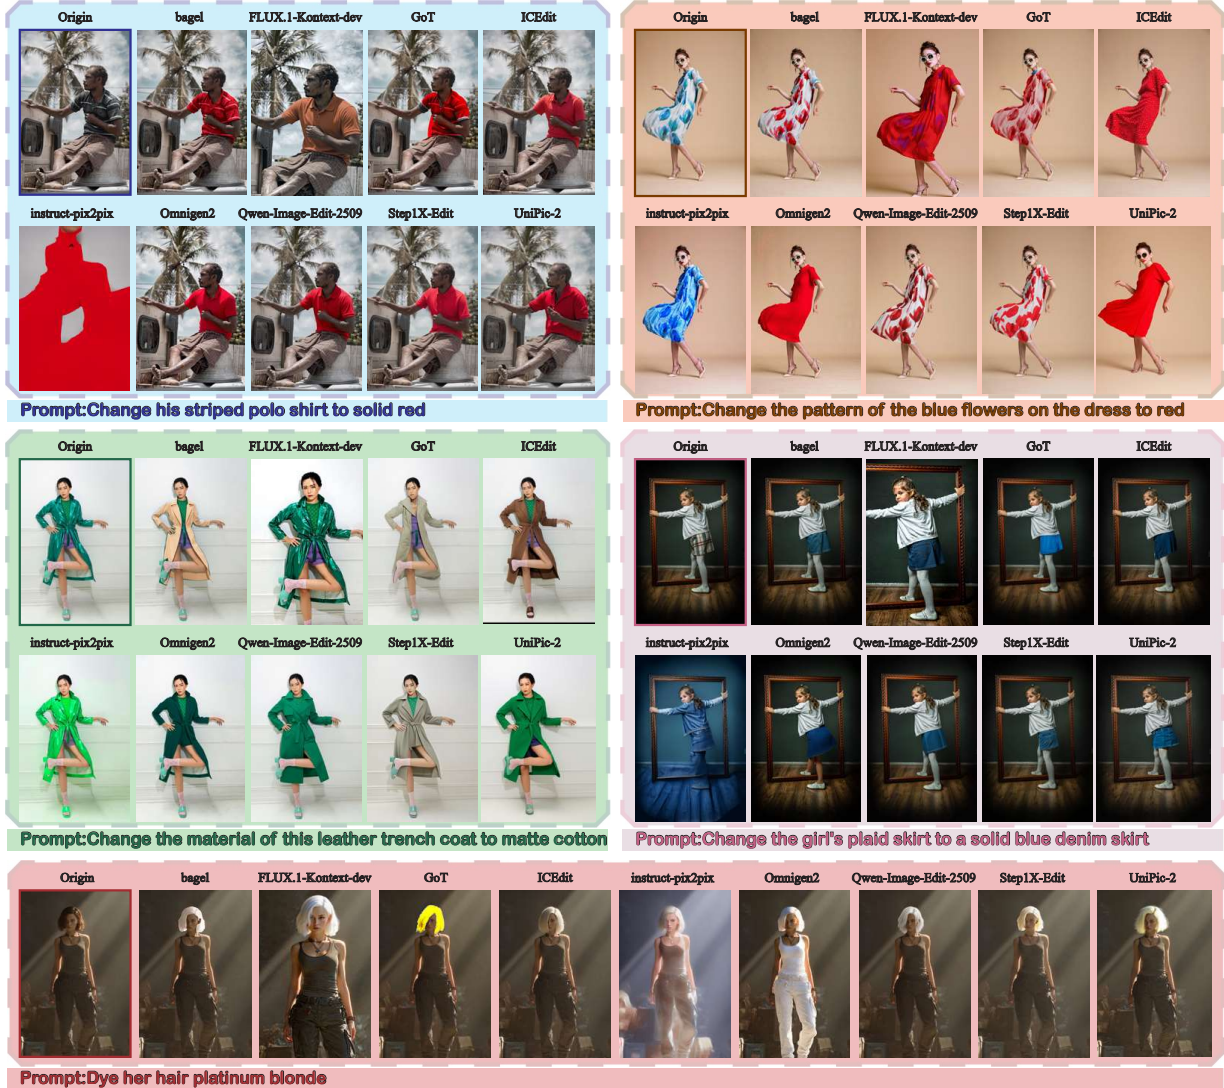

For SCENE: In several image editing tasks related to the scene, we can see that, except for Qwen-Image-Edit-2509, the other models do not perform very well when processing the scene, and always leave editing traces when manipulating objects in the image.

Figure 2. Visual examples for the “Local Attribute Editing” category. This figure shows multiple test cases from this category, including their corresponding source images, prompts, and output results.



## Hybrid Editing

As we can see, in Hybrid Editing, most models perform worse than in other editing tasks, but Qwen-Image-Edit-2509 remains very stable and accurately meets the task requirements, while other models introduce many flaws.

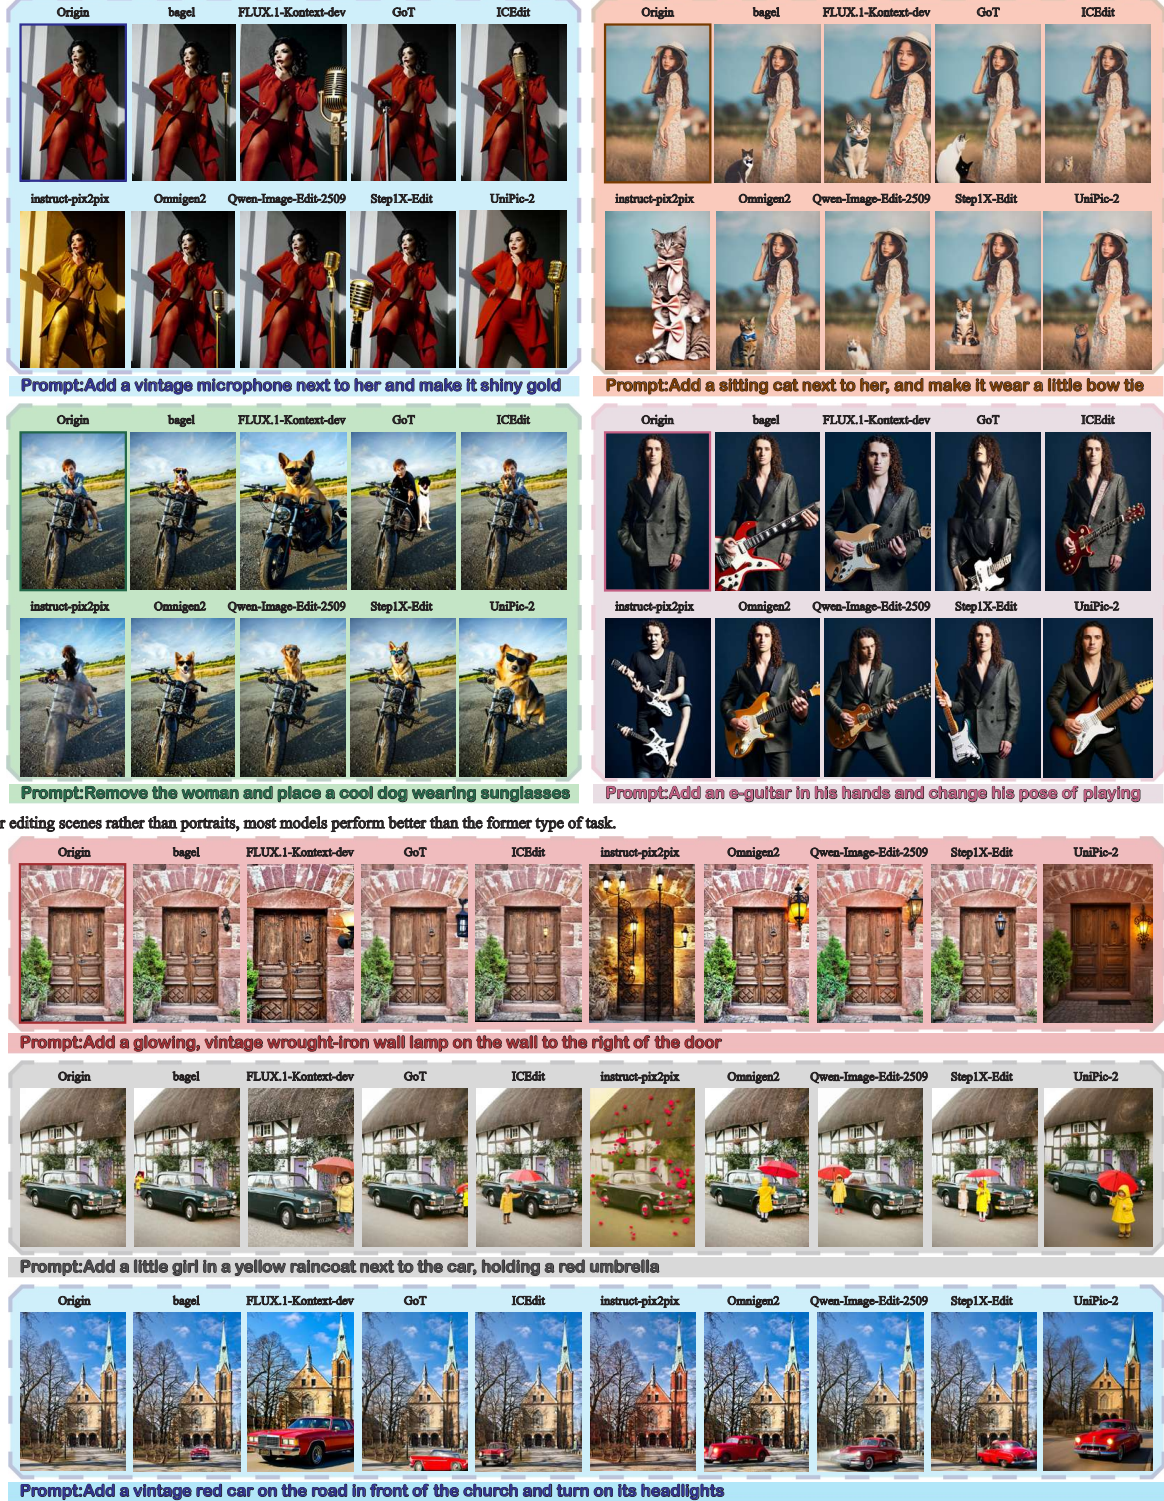

Figure 3. Visual examples for the “Hybrid Editing” category. This figure shows multiple test cases from this category, including their corresponding source images, prompts, and output results.



## Text Rendering

For editing images of scenes rather than people, most of the editing done on the models is rather abrupt and fails to maintain consistency with the style of the original image.

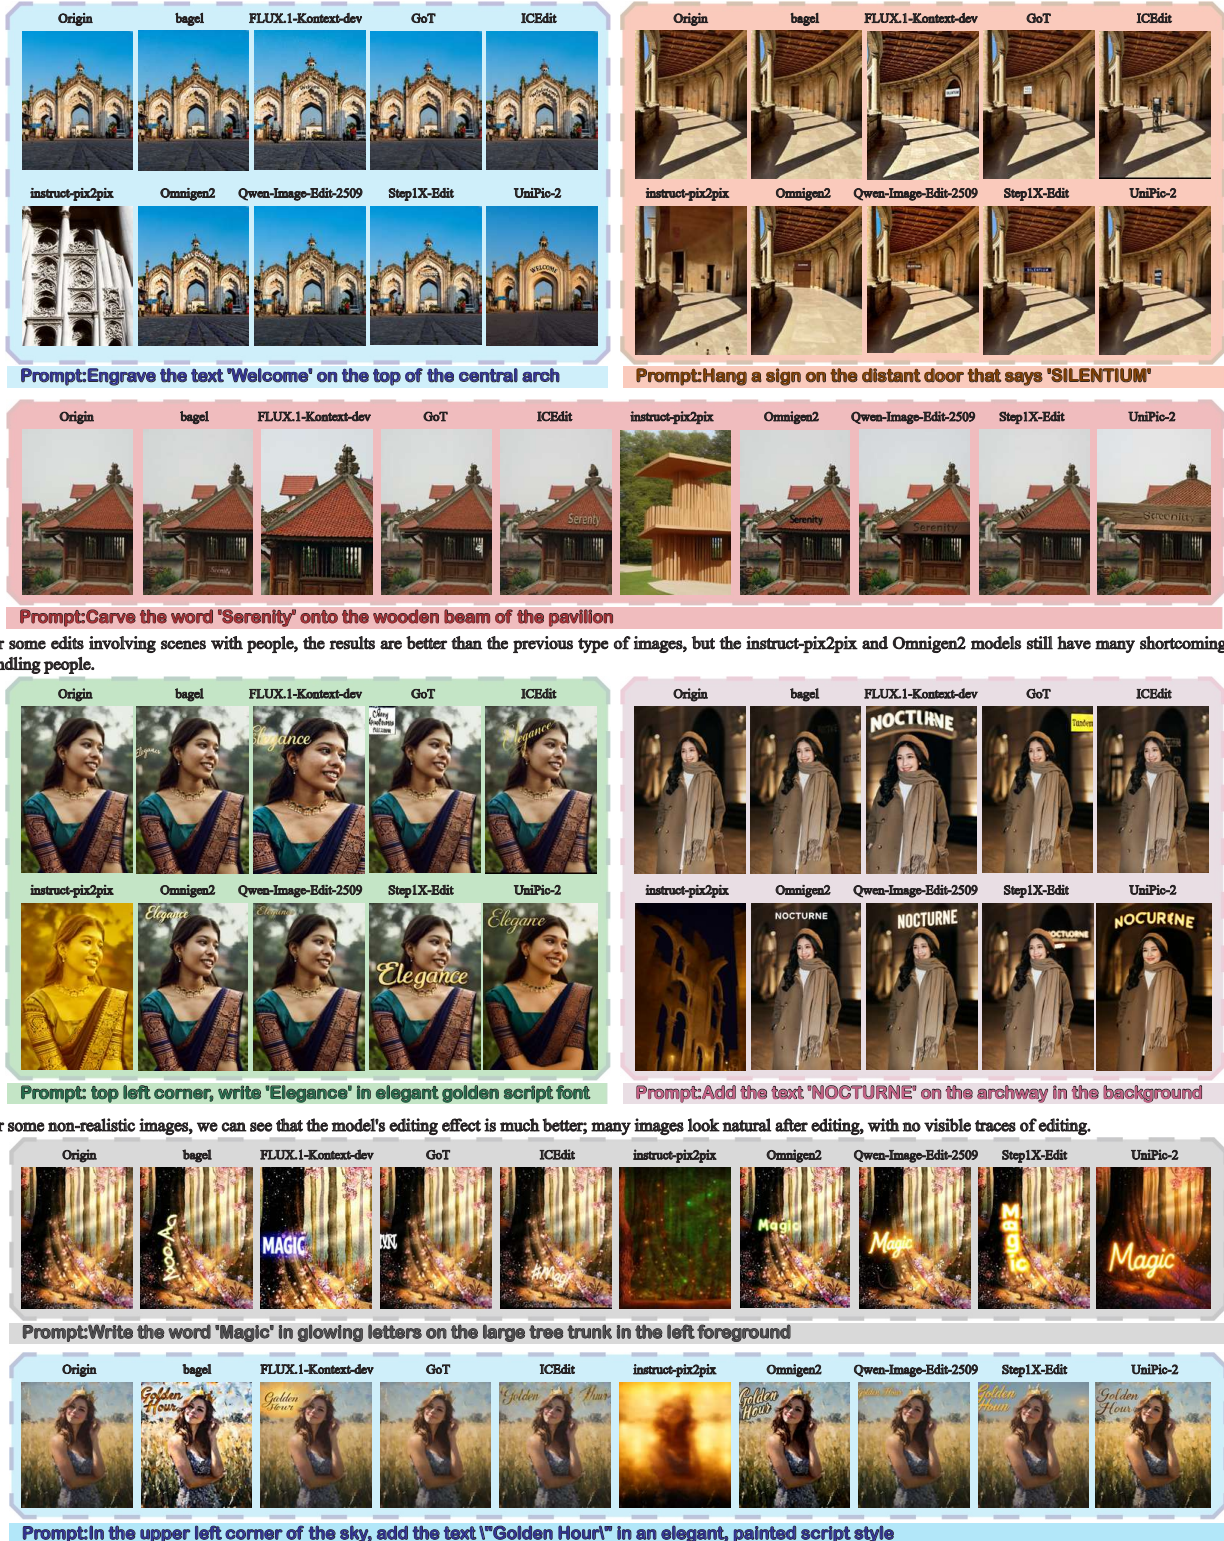

Figure 4. Visual examples for the “Text Rendering” category. This figure shows multiple test cases from this category, including their corresponding source images, prompts, and output results.



## World Knowledge & Reasoning

In this chapter, our prompt is not as straightforward as the previous tasks; instead, it incorporates a lot of world knowledge and reasoning. As you can see, the image quality becomes inconsistent, with a very large variance, revealing numerous problems.

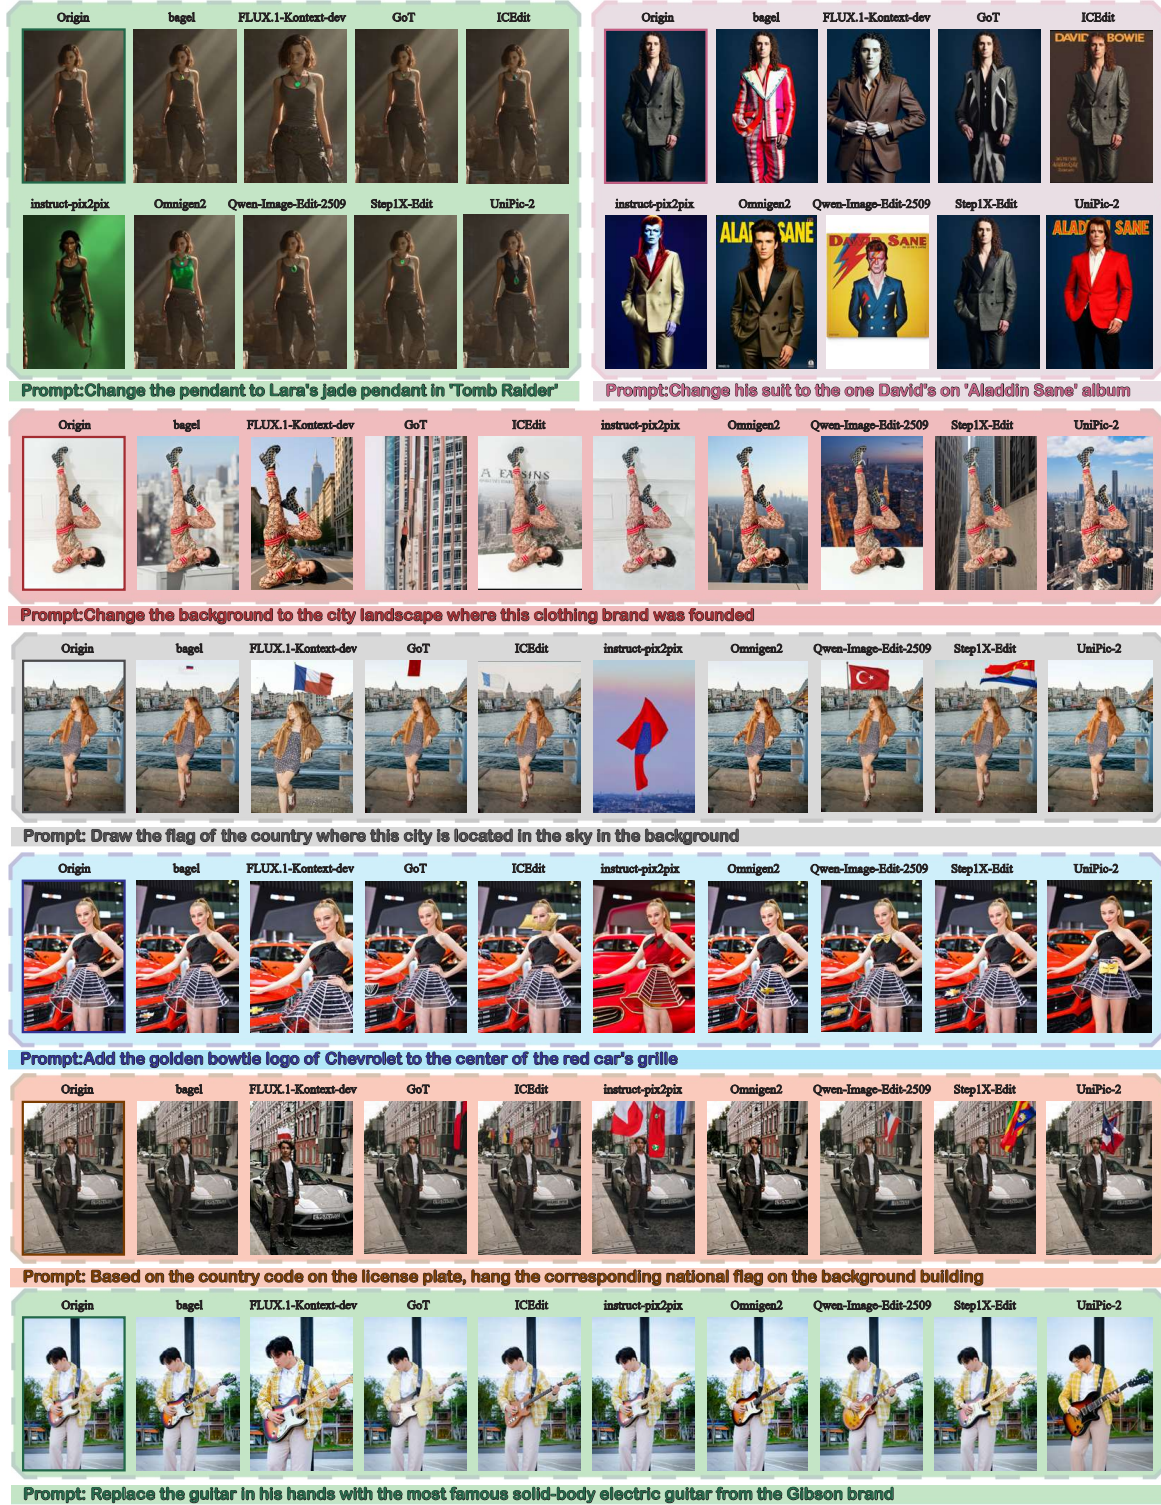

Figure 5. Visual examples for the “World Knowledge & Reasoning” category. This figure shows multiple test cases from this category, including their corresponding source images, prompts, and output results.



## Basic Combination

| Figure1                                                                             | Figure2                                                                             | Figure3                                                                             | Prompt                                                                                                                                                                                                                           | Omnigen2                                                                            | Qwen-Image-Edit-2509                                                                  | DreamOmni2                                                                            | Nano-banana                                                                           |
|-------------------------------------------------------------------------------------|-------------------------------------------------------------------------------------|-------------------------------------------------------------------------------------|----------------------------------------------------------------------------------------------------------------------------------------------------------------------------------------------------------------------------------|-------------------------------------------------------------------------------------|---------------------------------------------------------------------------------------|---------------------------------------------------------------------------------------|---------------------------------------------------------------------------------------|
|    |    |    | Please naturally blend the three characters, Naruto from Figure 1, Luffy from Figure 2, and Conan from Figure 3, into a single image, having them stand side by side on a beach.                                                 |    |    |    |    |
| Figure1                                                                             | Figure2                                                                             | Figure3                                                                             | Prompt                                                                                                                                                                                                                           | Omnigen2                                                                            | Qwen-Image-Edit-2509                                                                  | DreamOmni2                                                                            | Nano-banana                                                                           |
|    |    |    | Please naturally merge the female character from Figure 1 and the female character from Figure 2 into the street scene background of Figure 3, so that they look like they are waiting for a car together by the roadside.       |    |    |    |    |
| Figure1                                                                             | Figure2                                                                             | Figure3                                                                             | Prompt                                                                                                                                                                                                                           | Omnigen2                                                                            | Qwen-Image-Edit-2509                                                                  | DreamOmni2                                                                            | Nano-banana                                                                           |
|   |   |   | Naturally merge the girl from Figure 2 and the red-robed skeleton from Figure 3 onto the forest path in Figure 1, making them look like they are walking side by side.                                                           |   |   |   |   |
| Figure1                                                                             | Figure2                                                                             | Figure3                                                                             | Prompt                                                                                                                                                                                                                           | Omnigen2                                                                            | Qwen-Image-Edit-2509                                                                  | DreamOmni2                                                                            | Nano-banana                                                                           |
|  |  |  | Combine the lady from Figure 1, the bicycle from Figure 2, and the elephant from Figure 3, so that the lady is riding the bicycle with the elephant beside her, and they appear together in the grassland scene from Figure 3.   |  |  |  |  |
| Figure1                                                                             | Figure2                                                                             | Figure3                                                                             | Prompt                                                                                                                                                                                                                           | Omnigen2                                                                            | Qwen-Image-Edit-2509                                                                  | DreamOmni2                                                                            | Nano-banana                                                                           |
|  |  |  | Seamlessly blend the lady from Figure 1 and the white kitten from Figure 2 into the rock background of Figure 3, with the lady gently holding the kitten, while maintaining a natural and realistic style for the overall image. |  |  |  |  |
| Figure1                                                                             | Figure2                                                                             | Figure3                                                                             | Prompt                                                                                                                                                                                                                           | Omnigen2                                                                            | Qwen-Image-Edit-2509                                                                  | DreamOmni2                                                                            | Nano-banana                                                                           |
|  |  |                                                                                     | Seamlessly blend the man from Figure 1 into the street scene of Figure 2, seating him on the stone wall on the left side of the street while maintaining consistency in the overall lighting and style.                          |  |  |  |  |

Figure 6. Visual examples for the “Basic Combination” category. This figure shows multiple test cases from this category, including their corresponding source images, prompts, and output results.

## Combination + Content Editing

| Figure1                                                                             | Figure2                                                                             | Prompt                                                                                                                                                                                                                                                                                                    | Omnigen2                                                                                                                                                                                                                                                                                                                                                                                   | Qwen-Image-Edit-2509                                                                  | DreamOmni2                                                                            | Nano-banana                                                                           |                                                                                       |
|-------------------------------------------------------------------------------------|-------------------------------------------------------------------------------------|-----------------------------------------------------------------------------------------------------------------------------------------------------------------------------------------------------------------------------------------------------------------------------------------------------------|--------------------------------------------------------------------------------------------------------------------------------------------------------------------------------------------------------------------------------------------------------------------------------------------------------------------------------------------------------------------------------------------|---------------------------------------------------------------------------------------|---------------------------------------------------------------------------------------|---------------------------------------------------------------------------------------|---------------------------------------------------------------------------------------|
|    |    | Merge the lady from Figure 1 and the bus from Figure 2 into the same scene. Please change the lady's pose so she is waving at the bus, and change the color of her suit jacket to red. Also, change the body color of the bus from yellow to blue.                                                        |                                                                                                                                                                                                                                                                                                           |    |    |    |                                                                                       |
| Figure1                                                                             | Figure2                                                                             | Prompt                                                                                                                                                                                                                                                                                                    | Omnigen2                                                                                                                                                                                                                                                                                                                                                                                   | Qwen-Image-Edit-2509                                                                  | DreamOmni2                                                                            | Nano-banana                                                                           |                                                                                       |
|    |    | Merge the characters from Figure 1 and Figure 2 into a single scene, have them both wear the orange turtleneck sweater and the glasses from the character in Figure 2, and use the orange background from Figure 2.                                                                                       |                                                                                                                                                                                                                                                                                                           |    |    |    |                                                                                       |
| Figure1                                                                             | Figure2                                                                             | Prompt                                                                                                                                                                                                                                                                                                    | Omnigen2                                                                                                                                                                                                                                                                                                                                                                                   | Qwen-Image-Edit-2509                                                                  | DreamOmni2                                                                            | Nano-banana                                                                           |                                                                                       |
|   |   | Place the yellow car from Figure 2 into the beach scene of Figure 1, and change its color to bright red. At the same time, change the weather in Figure 1 from sunny to a dark, overcast day, with a rough and turbulent sea.                                                                             |                                                                                                                                                                                                                                                                                                          |   |   |   |                                                                                       |
| Figure1                                                                             | Figure2                                                                             | Figure3                                                                                                                                                                                                                                                                                                   | Prompt                                                                                                                                                                                                                                                                                                                                                                                     | Omnigen2                                                                              | Qwen-Image-Edit-2509                                                                  | DreamOmni2                                                                            | Nano-banana                                                                           |
|  |  |                                                                                                                                                                                                                        | Merge the lady from Figure 1 and the grandparent and grandchild from Figure 3 into the beach background of Figure 2. Please change the color of the lady's dress in Figure 1 to an orange-red that matches the sunset in Figure 2, and change the pose of the grandparent and grandchild in Figure 3 from looking down at a phone to looking up together to admire the sunset in Figure 2. |    |  |  |  |
| Figure1                                                                             | Figure2                                                                             | Figure3                                                                                                                                                                                                                                                                                                   | Prompt                                                                                                                                                                                                                                                                                                                                                                                     | Omnigen2                                                                              | Qwen-Image-Edit-2509                                                                  | DreamOmni2                                                                            | Nano-banana                                                                           |
|  |  |                                                                                                                                                                                                                        | Place the woman from Figure 2 and the monk from Figure 3 into the scene of Figure 1. Change the sky in Figure 1 to an orange evening glow, and change the color of the woman's clothes in Figure 2 to the same orange as the monk's robe in Figure 3. Change the monk in Figure 3 from a sitting to a standing position to stand side-by-side with the woman from Figure 2.                |    |  |  |  |
| Figure1                                                                             | Figure2                                                                             | Prompt                                                                                                                                                                                                                                                                                                    | Omnigen2                                                                                                                                                                                                                                                                                                                                                                                   | Qwen-Image-Edit-2509                                                                  | DreamOmni2                                                                            | Nano-banana                                                                           |                                                                                       |
|  |  | Merge the man from Figure 1 and the woman from Figure 2 into the city street background of Figure 1, retaining the Porsche sports car in the background. Please change the woman from Figure 2's expression from serious to a happy smile, and change the man from Figure 1's brown coat to a red jacket. |                                                                                                                                                                                                                                                                                                         |  |  |  |                                                                                       |

Figure 7. Visual examples for the “Combination + Content Editing” category. This figure shows multiple test cases from this category, including their corresponding source images, prompts, and output results.



## Combination + Text Rendering

| Figure1                                                                             | Figure2                                                                             |                                                                                     | Prompt                                                                                                                                                                                                                                                                                               | Omnigen2                                                                            | Qwen-Image-Edit-2509                                                                  | DreamOmni2                                                                            | Nano-banana                                                                           |
|-------------------------------------------------------------------------------------|-------------------------------------------------------------------------------------|-------------------------------------------------------------------------------------|------------------------------------------------------------------------------------------------------------------------------------------------------------------------------------------------------------------------------------------------------------------------------------------------------|-------------------------------------------------------------------------------------|---------------------------------------------------------------------------------------|---------------------------------------------------------------------------------------|---------------------------------------------------------------------------------------|
|    |    |                                                                                     | Combine the female character from Figure 1 and the male character with the mule from Figure 2 into a single scene, using the village environment from Figure 2 as the background. In the upper right corner of the image, add the text 'Echoes of the Ancient Road' in a retro, brown artistic font. |    |    |    |    |
| Figure1                                                                             | Figure2                                                                             | Figure3                                                                             | Prompt                                                                                                                                                                                                                                                                                               | Omnigen2                                                                            | Qwen-Image-Edit-2509                                                                  | DreamOmni2                                                                            | Nano-banana                                                                           |
|    |    |    | Place the female figure from Figure 1 into the waiting room scene of Figure 2, and replace the content of the TV screen on the wall in Figure 2 with the word 'BLOG' from Figure 3. Below the TV screen, add a line of text in a gold artistic font: 'Fashionable Life'.                             |    |    |    |    |
| Figure1                                                                             | Figure2                                                                             | Figure3                                                                             | Prompt                                                                                                                                                                                                                                                                                               | Omnigen2                                                                            | Qwen-Image-Edit-2509                                                                  | DreamOmni2                                                                            | Nano-banana                                                                           |
|   |   |   | Place the lady from Figure 2 into the station scene of Figure 1. On the side of the train in Figure 1, render the text 'HAPPY BIRTHDAY TO YOU!' from Figure 3 in a prominent golden font.                                                                                                            |   |   |   |   |
| Figure1                                                                             | Figure2                                                                             | Figure3                                                                             | Prompt                                                                                                                                                                                                                                                                                               | Omnigen2                                                                            | Qwen-Image-Edit-2509                                                                  | DreamOmni2                                                                            | Nano-banana                                                                           |
|  |  |  | Place the man from Figure 2 into the stone slab alley of Figure 1, having him lean against the wall on the right. On the wall above the man's head, please add a sign that reads 'Time Alley', referencing the font style and the red-background-with-white-text design from Figure 3.               |  |  |  |  |
| Figure1                                                                             | Figure2                                                                             | Figure3                                                                             | Prompt                                                                                                                                                                                                                                                                                               | Omnigen2                                                                            | Qwen-Image-Edit-2509                                                                  | DreamOmni2                                                                            | Nano-banana                                                                           |
|  |  |  | Merge the lady from Figure 2 and the pavilion from Figure 1 into a single scene, with the city from Figure 2 as the background. In the sky area of the image, add a new line of text, 'Serenity in the City', in the red, 3D style of the word 'THURSDAY' from Figure 3.                             |  |  |  |  |
| Figure1                                                                             | Figure2                                                                             |                                                                                     | Prompt                                                                                                                                                                                                                                                                                               | Omnigen2                                                                            | Qwen-Image-Edit-2509                                                                  | DreamOmni2                                                                            | Nano-banana                                                                           |
|  |  |                                                                                     | Naturally integrate the lady and her violin from Figure 2 with the man and dog from Figure 1 into the steps scene of Figure 1. On the wall behind them, add the golden artistic text: 'Afternoon Serenade'.                                                                                          |  |  |  |  |

Figure 8. Visual examples for the “Combination + Text Rendering” category. This figure shows multiple test cases from this category, including their corresponding source images, prompts, and output results.

## Combination + Editing + Text

| Figure1 | Figure2 | Figure3 | Prompt                                                                                                                                                                                                                                                                                                                                                                                                                   | Omnigen2 | Qwen-Image-Edit-2509 | DreamOmni2 | Nano-banana |
|---------|---------|---------|--------------------------------------------------------------------------------------------------------------------------------------------------------------------------------------------------------------------------------------------------------------------------------------------------------------------------------------------------------------------------------------------------------------------------|----------|----------------------|------------|-------------|
|         |         |         | erge the man from Figure 2 and the sports car from Figure 3 into the corridor scene in Figure 1. Please change the scene in Figure 1 to dusk and turn on the lights in the corridor. Change the man's pose to leaning against the car door, and open the door of the sports car. Finally, clearly write the text "\VGR-2024\" on the sports car's license plate.                                                         |          |                      |            |             |
|         |         |         | Change the scene in Figure 1 to a stormy night, and place the man from Figure 2 at the church entrance. Please remove the sunglasses from the man's face and make his expression look terrified. Finally, imitating the handwritten style of Figure 3, write the line 'Where is the path to redemption?' in white at the bottom of the image.                                                                            |          |                      |            |             |
|         |         |         | Place the lady from Figure 2 in Figure 1, and blend the background with the building from Figure 3. Please change the lady's pose to an action of pushing the door with one hand, and change her clothes to a blue business suit. On the stone archway above the wooden door in Figure 1, add the golden text 'The Portal' in a font style similar to the one in Figure 3. Make the potted plants in Figure 1 more lush. |          |                      |            |             |
|         |         |         | Place the woman from Figure 1 and the woman from Figure 2 into the scene of Figure 3. Change the clothes of the woman from Figure 1 to a kimono, and change the color of the sports car in Figure 3 to red. Finally, at the top center of the image, add the text '産信' in a black calligraphy font.                                                                                                                      |          |                      |            |             |
|         |         |         | Place the lady from Figure 2 and the yellow suitcase from Figure 3 into the square in Figure 1. Please change the lady's pose to be sitting on the suitcase, smiling and looking at the camera. Remove all the cars from the scene in Figure 1. In the top right corner of the image, add a line of text in an elegant, flowing font that reads: '\Let's go on a spontaneous trip!'. The text color should be gold.      |          |                      |            |             |
|         |         |         | Place the man from Figure 2 into the bedroom scene of Figure 1, have him sit on the bed reading a book (add a book for him), change the blue plaid quilt on the bed in Figure 1 to solid gray, and add a line of golden text on the wall at the head of the bed: '\Chapter One\".                                                                                                                                        |          |                      |            |             |

Figure 9. Visual examples for the “Combination + Editing + Text” category. This figure shows multiple test cases from this category, including their corresponding source images, prompts, and output results.



## Combination + Reasoning

| Figure1 | Figure2 | Figure3 | Prompt                                                                                                                                                                                                                                                                                                                                                                                                                    | Omnigen2 | Qwen-Image-Edit-2509 | DreamOmni2 | Nano-banana |
|---------|---------|---------|---------------------------------------------------------------------------------------------------------------------------------------------------------------------------------------------------------------------------------------------------------------------------------------------------------------------------------------------------------------------------------------------------------------------------|----------|----------------------|------------|-------------|
|         |         |         | Place the lady from Figure 2 and the man from Figure 3 into the bedroom scene of Figure 1, so they look like they are celebrating. On the bedside table between them, place a cake with the birth year of the founder of the brand (Adidas) on the man's T-shirt from Figure 3 written on it in frosting.                                                                                                                 |          |                      |            |             |
|         |         |         | Harmoniously place the three individuals—the man from Figure 1, the woman from Figure 2, and the woman from Figure 3—into the city harbor background from Figure 3, creating the atmosphere of a high-fashion photoshoot. At the top of the image, add the name of the world's most populous city in an elegant font.                                                                                                     |          |                      |            |             |
|         |         |         | Merge the woman from Figure 1 and the woman from Figure 2 into the scene of Figure 3. They are sitting on a bench, looking like they are sharing a secret. In the air above their heads, write text in the official language of the country of origin of the camera brand in Figure 1, using a neon light effect font.                                                                                                    |          |                      |            |             |
|         |         |         | Place the blue performer from Figure 1 and the lady from Figure 2 into the scene of Figure 3, and have them both sit on the bench. Please add a wooden signpost by the road in Figure 3. On the signpost, write the name of the capital of the country of origin for the guitar in Figure 1, using a vintage font.                                                                                                        |          |                      |            |             |
|         |         |         | Please place the woman from Figure 1 and the woman from Figure 3 into the scene of Figure 2, making them look as if they are on a road trip. The woman from Figure 1 should be in the driver's seat, and the woman from Figure 3 in the passenger seat. At the top of the image, add text in a prominent font. The text should be the name of the capital city of the country to which the car brand in Figure 2 belongs. |          |                      |            |             |
|         |         |         | Merge the woman and dog from Figure 1 with the groom and bride from Figure 2 into a brand new lawn wedding scene. Add a line of text at the top of the image, the content of which is the most classic three-character Chinese response from the newlyweds' exchange of vows at the wedding ceremony in Figure 2.                                                                                                         |          |                      |            |             |

Figure 10. Visual examples for the “Combination + Reasoning” category. This figure shows multiple test cases from this category, including their corresponding source images, prompts, and output results.
